# Supplementary material for: Contribution of Podoviridae and Myoviridae bacteriophages to the effectiveness of anti-staphylococcal therapeutic cocktails
Source: PubMed Central journal article supplement (PMC7596081; doi:10.1038/s41598-020-75637-x), 2020-10-29
Supplement: 41598_2020_75637_MOESM1_ESM.pdf [file 41598_2020_75637_MOESM1_ESM.pdf]

## SUPPLEMENTARY MATERIAL

### **Contribution of *Podoviridae* and *Myoviridae* bacteriophages to the effectiveness of anti-staphylococcal therapeutic cocktails**

M. Kornienko<sup>1</sup>, N. Kuptsov<sup>1</sup>, R. Gorodnichev<sup>1</sup>, D. Bespiatykh<sup>1</sup>, A. Guliaev<sup>1</sup>, M. Letarova<sup>2</sup>, E. Kulikov<sup>2</sup>, V. Veselovsky<sup>1</sup>, M. Malakhova<sup>1</sup>, A. Letarov<sup>2</sup>, E. Ilina<sup>1</sup>, E. Shitikov<sup>1</sup>

<sup>1</sup> Federal Research and Clinical Center of Physical-Chemical Medicine, Moscow, Russia

<sup>2</sup> Research Center of Biotechnology of the Russian Academy of Sciences, Winogradsky Institute of Microbiology, Moscow, Russia

|                  |           |
|------------------|-----------|
| <b>Table S1</b>  | <b>2</b>  |
| <b>Table S2</b>  | <b>8</b>  |
| <b>Figure S1</b> | <b>10</b> |

Table S1. Characterization of *Staphylococcus spp* strains

| Strain    | Species          | City             | Origin                    | Drugs susceptibility |                 |               |             |              |            |              |           |              |            | MLST | Spa type                          | The plaque assay results |               |                                       |                                            |                |
|-----------|------------------|------------------|---------------------------|----------------------|-----------------|---------------|-------------|--------------|------------|--------------|-----------|--------------|------------|------|-----------------------------------|--------------------------|---------------|---------------------------------------|--------------------------------------------|----------------|
|           |                  |                  |                           | Oxacillin            | Chloramphenicol | Ciprofloxacin | Clindamycin | Erythromycin | Gentamicin | Levofloxacin | Linezolid | Tetracycline | Vancomycin |      |                                   | vB_SauM-515A1            | vB_SauP-436A1 | Staphylococcus bacteriophage cocktail | mixture of vB_SauM-515A1 and vB_SauP-436A1 | vB_SauM_fRuSau |
| SA0090V   | <i>S. aureus</i> | Seversk          | conjunctiva               | R                    | S               | S             | N/D         | S            | S          | S            | N/D       | S            | N/D        |      | t759                              | -                        | -             | -                                     | -                                          | -              |
| SA0172REV | <i>S. aureus</i> | Moscow           | nervous system injury     | S                    | S               | S             | S           | S            | S          | S            | S         | S            | S          |      | t435                              | -                        | +             | -                                     | +                                          | -              |
| SA0184REV | <i>S. aureus</i> | Moscow           | endotracheal tube         | S                    | S               | S             | S           | S            | S          | S            | S         | S            | S          |      | unique 08-16-02-16-13-13-17-13-13 | -                        | +             | -                                     | +                                          | -              |
| SA0210V   | <i>S. aureus</i> | Samara           | eyelid infection          | S                    | S               | S             | N/D         | S            | S          | S            | N/D       | S            | N/D        |      | unique 08-34-24-25-25             | -                        | -             | -                                     | -                                          | -              |
| SA0412REV | <i>S. aureus</i> | Lipetsk          | skin infection            | R                    | R               | S             | R           | R            | R          | S            | S         | I            | S          |      | t723                              | -                        | +             | -                                     | +                                          | -              |
| SA0606REV | <i>S. aureus</i> | Oryol            | skin infection            | S                    | S               | S             | S           | S            | S          | S            | S         | S            | S          |      | t3625                             | -                        | -             | -                                     | -                                          | -              |
| SA0722REV | <i>S. aureus</i> | Tomsk            | blood                     | S                    | S               | S             | S           | S            | S          | S            | S         | S            | S          |      | t127                              | -                        | -             | -                                     | -                                          | -              |
| SA1550REV | <i>S. aureus</i> | Rostov-on-Don    | abdominal space infection | S                    | S               | S             | S           | S            | S          | S            | S         | S            | S          |      | t267                              | -                        | -             | -                                     | -                                          | -              |
| SA2013REV | <i>S. aureus</i> | Voronezh         | skin infection            | S                    | S               | S             | S           | S            | S          | S            | S         | S            | S          |      | t3625                             | -                        | -             | -                                     | -                                          | -              |
| SA2060REV | <i>S. aureus</i> | Tolyatti         | blood                     | S                    | S               | S             | S           | S            | S          | S            | S         | S            | S          |      | t2361                             | -                        | -             | -                                     | -                                          | -              |
| SA0013BAS | <i>S. aureus</i> | Tumen            | blood                     | R                    | R               | S             | R           | R            | R          | S            | S         | R            | S          |      | t008                              | +                        | -             | +                                     | +                                          | +              |
| SA0037REV | <i>S. aureus</i> | Smolensk         | skin infection            | S                    | R               | S             | S           | S            | S          | S            | S         | S            | S          |      | t435                              | +                        | +             | +                                     | +                                          | +              |
| SA0038REV | <i>S. aureus</i> | Smolensk         | abdominal space infection | R                    | R               | I             | R           | R            | R          | R            | S         | R            | S          |      | t190                              | +                        | +             | +                                     | +                                          | +              |
| SA0054V   | <i>S. aureus</i> | Irkutsk          | conjunctiva               | S                    | S               | S             | N/D         | S            | S          | S            | N/D       | S            | N/D        |      | t081                              | +                        | +             | +                                     | +                                          | +              |
| SA0064BAS | <i>S. aureus</i> | Saint Petersburg | blood                     | R                    | R               | R             | S           | S            | S          | R            | S         | R            | S          |      | t008                              | +                        | +             | +                                     | +                                          | +              |

|           |                  |                 |                            |   |   |   |     |   |   |   |     |   |     |       |   |             |   |   |   |
|-----------|------------------|-----------------|----------------------------|---|---|---|-----|---|---|---|-----|---|-----|-------|---|-------------|---|---|---|
| SA0088ST  | <i>S. aureus</i> | Krasnodar       | skin wound                 | R | S | S | S   | S | S | S | S   | S | S   | t308  | + | +           | + | + | + |
| SA0088V   | <i>S. aureus</i> | Seversk         | conjunctiva                | S | S | S | N/D | S | S | S | N/D | S | N/D | t9374 | + | +           | + | + | + |
| SA0103BAS | <i>S. aureus</i> | Krasnodar       | blood                      | S | S | S | S   | S | S | S | S   | S | S   | t127  | + | +           | + | + | + |
| SA0117V   | <i>S. aureus</i> | Vologda         | eyelid infection           | S | R | S | N/D | S | S | S | N/D | S | N/D | t435  | + | +           | + | + | + |
| SA0120V   | <i>S. aureus</i> | Vologda         | conjunctiva                | S | S | S | N/D | S | S | S | N/D | S | N/D | t1407 | + | +           | + | + | + |
| SA0156V   | <i>S. aureus</i> | Smolensk        | conjunctiva                | S | S | S | N/D | S | S | S | N/D | S | N/D | t267  | + | +           | + | + | + |
| SA0158V   | <i>S. aureus</i> | Smolensk        | conjunctiva                | S | S | S | N/D | S | S | S | N/D | S | N/D | t267  | + | +           | + | + | + |
| SA0177REV | <i>S. aureus</i> | Moscow          | endotracheal tube          | R | R | I | R   | R | R | R | S   | R | S   | t030  | + | +           | + | + | + |
| SA0187ST  | <i>S. aureus</i> | Krasnodar       | bones and joints infection | R | S | S | S   | S | S | S | S   | S | S   | t021  | + | -           | + | + | + |
| SA0191REV | <i>S. aureus</i> | Moscow          | spinal fluid               | R | R | I | R   | R | R | R | S   | R | S   | t030  | + | +           | + | + | - |
| SA0220V   | <i>S. aureus</i> | Smolensk        | conjunctiva                | R | S | S | N/D | S | S | S | N/D | S | N/D | t267  | + | +           | + | + | + |
| SA0293REV | <i>S. aureus</i> | Voronezh        | blood                      | S | S | S | S   | S | S | S | S   | S | S   | t385  | + | +           | + | + | + |
| SA0326REV | <i>S. aureus</i> | Tomsk           | lungs                      | R | R | R | R   | R | R | R | S   | S | S   | t008  | + | -           | + | + | + |
| SA0346ST  | <i>S. aureus</i> | Moscow          | abscessus                  | R | S | S | R   | R | R | S | S   | R | S   | t024  | + | +           | + | + | + |
| SA0372ST  | <i>S. aureus</i> | Moscow          | abscessus                  | R | R | S | R   | R | R | S | S   | R | S   | t308  | + | +           | + | + | + |
| SA0385REV | <i>S. aureus</i> | Yekaterinburg   | bronchoalveolar lavage     | S | S | S | S   | S | S | S | S   | S | S   | t015  | + | +           | + | + | + |
| SA0395ST  | <i>S. aureus</i> | Moscow          | skin infection             | R | S | S | S   | S | S | S | S   | S | S   | t1023 | + | +           | + | + | + |
| SA0402REV | <i>S. aureus</i> | Lipetsk         | bones and joints infection | R | R | R | R   | R | R | R | S   | R | S   | t233  | + | +           | + | + | + |
| SA0413REV | <i>S. aureus</i> | Lipetsk         | skin infection             | S | R | I | R   | R | R | R | S   | R | S   | t008  | + | +           | + | + | + |
| SA0414REV | <i>S. aureus</i> | Lipetsk         | skin infection             | R | R | R | R   | R | R | R | S   | R | S   | t008  | + | -           | + | + | + |
| SA0422ST  | <i>S. aureus</i> | Nizhny Novgorod | skin wound                 | R | R | S | S   | S | R | S | S   | R | S   | t008  | + | +           | + | + | + |
| SA436     | <i>S. aureus</i> | Nizhny Novgorod | nose                       | R | S | S | S   | S | R | S | S   | R | S   | t127  | - | <b>host</b> | - | + | - |
| SA0440REV | <i>S. aureus</i> | Lipetsk         | skin infection             | R | R | R | R   | R | R | R | S   | R | S   | t233  | + | -           | + | + | + |
| SA0440ST  | <i>S. aureus</i> | Nizhny Novgorod | skin wound                 | R | R | S | R   | R | R | S | S   | R | S   | t008  | + | +           | + | + | + |
| SA0445ST  | <i>S. aureus</i> | Nizhny Novgorod | bones and joints infection | S | S | S | S   | S | S | S | S   | S | S   | t008  | + | +           | + | + | + |
| SA0449REV | <i>S. aureus</i> | Smolensk        | bones and joints infection | R | R | R | R   | R | R | R | S   | R | S   | t008  | + | +/-         | + | + | + |

|           |                  |                  |                            |   |   |   |   |   |   |   |   |   |   |  |       |   |   |   |   |   |
|-----------|------------------|------------------|----------------------------|---|---|---|---|---|---|---|---|---|---|--|-------|---|---|---|---|---|
| SA0455ST  | <i>S. aureus</i> | Nizhny Novgorod  | skin wound                 | R | R | S | R | R | S | S | S | R | S |  | t331  | + | - | + | + | + |
| SA0462ST  | <i>S. aureus</i> | Nizhny Novgorod  | throat                     | R | S | S | S | S | R | S | S | R | S |  | t008  | + | + | + | + | + |
| SA0565REV | <i>S. aureus</i> | Kazan            | endotracheal tube          | S | S | S | S | S | S | S | S | S | S |  | t9220 | + | + | + | + | + |
| SA0580REV | <i>S. aureus</i> | Noyabrsk         | blood                      | S | R | S | S | S | S | S | S | S | S |  | t267  | + | + | + | + | + |
| SA0592REV | <i>S. aureus</i> | Oryol            | skin infection             | S | S | S | S | S | S | S | S | S | S |  | t308  | + | + | + | + | + |
| SA0595ST  | <i>S. aureus</i> | Ryazan           | abdominal space infection  | R | S | S | S | S | S | S | S | S | S |  | t308  | + | + | + | + | + |
| SA0617REV | <i>S. aureus</i> | Oryol            | skin infection             | R | R | R | R | R | R | R | S | R | S |  | t008  | + | + | + | + | + |
| SA0620ST  | <i>S. aureus</i> | Saint Petersburg | bones and joints infection | R | R | S | R | R | R | S | S | R | S |  | t435  | + | + | + | + | + |
| SA0621REV | <i>S. aureus</i> | Oryol            | skin infection             | S | R | S | S | S | S | S | S | S | S |  | t2361 | + | + | + | + | + |
| SA0627REV | <i>S. aureus</i> | Smolensk         | abdominal space infection  | R | R | I | R | R | R | R | S | R | S |  | t008  | + | - | + | + | + |
| SA0702REV | <i>S. aureus</i> | Lipetsk          | bones and joints infection | S | S | S | S | S | S | S | S | I | S |  | t385  | + | + | + | + | + |
| SA0733ST  | <i>S. aureus</i> | Smolensk         | skin wound                 | R | R | S | S | R | S | S | S | R | S |  | t308  | + | + | + | + | + |
| SA0736ST  | <i>S. aureus</i> | Smolensk         | abdominal space infection  | R | S | S | S | S | S | S | S | S | S |  | t002  | + | + | + | + | + |
| SA0737ST  | <i>S. aureus</i> | Smolensk         | skin wound                 | R | S | S | S | S | S | S | S | S | S |  | t1460 | + | + | + | + | + |
| SA0756ST  | <i>S. aureus</i> | Smolensk         | skin wound                 | R | S | S | S | R | S | S | S | S | S |  | t435  | + | + | + | + | + |
| SA0837ST  | <i>S. aureus</i> | Smolensk         | skin wound                 | S | S | S | S | S | S | S | S | S | S |  | t008  | + | + | + | + | + |
| SA0855ST  | <i>S. aureus</i> | Smolensk         | skin wound                 | S | R | S | S | R | S | S | S | R | S |  | t008  | + | - | + | + | + |
| SA0859ST  | <i>S. aureus</i> | Smolensk         | skin wound                 | R | R | S | S | S | S | S | S | S | S |  | t008  | + | - | + | + | + |
| SA0866ST  | <i>S. aureus</i> | Saint Petersburg | bronchoalveolar lavage     | R | S | S | S | S | R | S | S | R | S |  | t008  | + | - | + | + | + |
| SA2003REV | <i>S. aureus</i> | Voronezh         | skin infection             | S | S | S | S | S | S | S | S | S | S |  | t308  | + | - | + | + | + |
| SA2014REV | <i>S. aureus</i> | Voronezh         | skin infection             | S | R | S | S | S | S | S | S | S | S |  | t008  | + | + | + | + | + |
| SA2080REV | <i>S. aureus</i> | Rostov-on-Don    | skin infection             | S | S | S | S | S | S | S | S | S | S |  | t008  | + | - | + | + | + |
| SA2142REV | <i>S. aureus</i> | Chelyabinsk      | skin infection             | R | R | I | R | R | R | R | S | R | S |  | N/D   | + | + | + | + | + |
| SA2153REV | <i>S. aureus</i> | Smolensk         | sputum                     | S | S | S | S | R | S | S | S | S | S |  | t002  | + | - | + | + | + |
| SA2242REV | <i>S. aureus</i> | Novosibirsk      | bones and joints infection | R | R | S | S | S | R | S | S | S | S |  | t008  | + | + | + | + | + |
| SA2260REV | <i>S. aureus</i> | Noyabrsk         | blood                      | S | S | S | S | S | S | S | S | R | S |  | t521  | + | + | + | + | + |

|           |                       |                  |                            |   |     |   |     |     |   |     |     |     |     |     |       |             |   |   |   |   |
|-----------|-----------------------|------------------|----------------------------|---|-----|---|-----|-----|---|-----|-----|-----|-----|-----|-------|-------------|---|---|---|---|
| SA2263REV | <i>S. aureus</i>      | Noyabrsk         | abdominal space infection  | S | R   | S | S   | S   | S | S   | S   | S   | S   | S   | t435  | +           | + | + | + | + |
| SA2281REV | <i>S. aureus</i>      | Smolensk         | blood                      | S | S   | S | S   | S   | S | S   | S   | S   | S   | S   | t435  | +           | + | + | + | + |
| SA2341REV | <i>S. aureus</i>      | Perm             | bones and joints infection | S | S   | S | S   | S   | S | S   | S   | S   | S   | S   | t5288 | +           | + | + | + | + |
| SA2377REV | <i>S. aureus</i>      | Perm             | bones and joints infection | S | S   | S | S   | S   | S | S   | S   | S   | S   | S   | t521  | +           | + | + | + | + |
| SA2429REV | <i>S. aureus</i>      | Lipetsk          | skin infection             | S | S   | S | S   | S   | S | S   | S   | S   | S   | S   | N/D   | +           | + | + | + | + |
| SA2442REV | <i>S. aureus</i>      | Lipetsk          | skin infection             | R | R   | R | R   | R   | R | R   | S   | R   | S   |     | t008  | +           | - | + | + | + |
| SA2464REV | <i>S. aureus</i>      | Yakutsk          | skin infection             | S | R   | S | S   | S   | S | S   | S   | S   | S   | S   | t002  | +           | - | + | + | + |
| SA515     | <i>S. aureus</i>      | Novosibirsk      | skin wound                 | S | S   | S | S   | S   | S | S   | S   | S   | S   | S   | t008  | <b>host</b> | - | + | + | + |
| SE495     | <i>S. epidermidis</i> | Moscow           | throat                     | R | R   | S | S   | S   | R | N/D | N/D | S   | S   | 22  |       | +           | - | + | + | + |
| SE0524UT3 | <i>S. epidermidis</i> | Nizhny Novgorod  | urine                      | S | N/D | S | N/D | N/D | S | S   | N/D | N/D | S   | 57  |       | -           | - | - | - | - |
| SE576     | <i>S. epidermidis</i> | Moscow           | throat                     | R | R   | S | S   | S   | R | N/D | N/D | S   | S   | 89  |       | -           | - | - | - | - |
| SE580     | <i>S. epidermidis</i> | Moscow           | throat                     | R | R   | S | S   | S   | R | N/D | N/D | S   | S   | 22  |       | +           | - | + | + | + |
| SE589     | <i>S. epidermidis</i> | Moscow           | fecal masses               | R | S   | R | R   | R   | R | N/D | N/D | R   | S   | 269 |       | -           | - | - | - | - |
| SE0003V   | <i>S. epidermidis</i> | Saint Petersburg | keratoderma infection      | R | R   | S | N/D | S   | I | S   | N/D | R   | N/D | 248 |       | -           | - | - | - | - |
| SE0006V   | <i>S. epidermidis</i> | Saint Petersburg | conjunctiva                | R | R   | S | N/D | R   | R | R   | N/D | S   | N/D | 59  |       | -           | - | - | - | - |
| SE0019V   | <i>S. epidermidis</i> | Saint Petersburg | conjunctiva                | R | S   | R | N/D | R   | R | R   | N/D | S   | N/D | 22  |       | +           | - | + | + | + |
| SE0020V   | <i>S. epidermidis</i> | Saint Petersburg | conjunctiva                | S | S   | S | N/D | S   | S | S   | N/D | S   | N/D | 83  |       | -           | - | - | - | - |
| SE0033V   | <i>S. epidermidis</i> | Vologda          | conjunctiva                | S | S   | S | N/D | S   | S | S   | N/D | S   | N/D | 19  |       | -           | - | - | - | - |
| SE0085V   | <i>S. epidermidis</i> | Yaroslavl        | conjunctiva                | R | S   | S | N/D | S   | S | S   | N/D | S   | N/D | 198 |       | -           | - | - | - | - |
| SE0100V   | <i>S. epidermidis</i> | Saint Petersburg | conjunctiva                | S | R   | S | N/D | S   | S | S   | N/D | S   | N/D | 6   |       | -           | - | - | - | - |
| SE0103V   | <i>S. epidermidis</i> | Saint Petersburg | conjunctiva                | R | S   | R | N/D | R   | R | R   | N/D | S   | N/D | 2   |       | -           | - | - | - | - |
| SE0105V   | <i>S. epidermidis</i> | Saint Petersburg | conjunctiva                | R | R   | R | N/D | R   | R | R   | N/D | S   | N/D | 59  |       | -           | - | - | - | - |
| SE0108V   | <i>S. epidermidis</i> | Saint Petersburg | conjunctiva                | S | S   | S | N/D | S   | S | S   | N/D | S   | N/D | 19  |       | -           | - | - | - | - |
| SE0109V   | <i>S. epidermidis</i> | Saint Petersburg | conjunctiva                | R | R   | S | N/D | S   | R | R   | N/D | S   | N/D | 52  |       | -           | - | - | - | - |

|           |                       |             |              |     |     |     |     |      |     |     |     |     |     |     |  |   |   |   |   |   |
|-----------|-----------------------|-------------|--------------|-----|-----|-----|-----|------|-----|-----|-----|-----|-----|-----|--|---|---|---|---|---|
| SE0247REV | <i>S. epidermidis</i> | Tyumen      | blood        | R   | R   | R   | R   | R    | R   | R   | R   | S   | S   | 2   |  | - | - | - | - | - |
| SE0286UT3 | <i>S. epidermidis</i> | Moscow      | urine        | R   | N/D | S   | N/D | N/D  | S   | S   | N/D | N/D | S   | 59  |  | - | - | - | - | - |
| SE0295REV | <i>S. epidermidis</i> | Kazan       | blood        | R   | S   | S   | S   | S    | R   | S   | S   | S   | S   | 59  |  | - | - | - | - | - |
| SE0379UT3 | <i>S. epidermidis</i> | Kazan       | urine        | R   | N/D | S   | N/D | N/D  | S   | S   | N/D | N/D | S   | 59  |  | - | - | - | - | - |
| SE0382UT3 | <i>S. epidermidis</i> | Kazan       | urine        | S   | N/D | S   | N/D | N/D  | S   | S   | N/D | N/D | S   | 5   |  | - | - | - | - | - |
| SE0384UT3 | <i>S. epidermidis</i> | Kazan       | urine        | R   | N/D | S   | N/D | N/D  | S   | S   | N/D | N/D | S   | 59  |  | + | - | + | + | + |
| SE0386UT3 | <i>S. epidermidis</i> | Kazan       | urine        | S   | N/D | S   | N/D | N/D  | S   | S   | N/D | N/D | S   | 86  |  | - | - | - | - | - |
| SE0419UT3 | <i>S. epidermidis</i> | Vladivostok | urine        | R   | N/D | S   | N/D | N/D  | R   | R   | N/D | N/D | S   | 59  |  | - | - | - | - | - |
| SE0449UT3 | <i>S. epidermidis</i> | Москва      | urine        | S   | N/D | S   | N/D | N/D  | S   | R   | N/D | N/D | S   | 173 |  | - | - | - | - | - |
| SE0571REV | <i>S. epidermidis</i> | Noyabrsk    | blood        | R   | S   | S   | S   | 0,25 | S   | R   | S   | S   | S   | 5   |  | - | - | - | - | - |
| SE178OPN  | <i>S. epidermidis</i> | Moscow      | fecal masses | N/D | N/D | N/D | N/D | N/D  | N/D | N/D | N/D | N/D | N/D | 59  |  | - | - | - | - | - |
| SE179OPN  | <i>S. epidermidis</i> | Moscow      | fecal masses | N/D | N/D | N/D | N/D | N/D  | N/D | N/D | N/D | N/D | N/D | 59  |  | - | - | - | - | - |
| SE2252REV | <i>S. epidermidis</i> | Noyabrsk    | blood        | S   | R   | S   | S   | S    | S   | S   | S   | S   | S   | 189 |  | - | - | - | - | - |
| SE2261REV | <i>S. epidermidis</i> | Noyabrsk    | blood        | R   | R   | R   | R   | R    | R   | R   | S   | S   | S   | 2   |  | - | - | - | - | - |
| SE416-2   | <i>S. epidermidis</i> | Moscow      | fecal masses | R   | R   | S   | S   | S    | R   | N/D | N/D | S   | S   | 22  |  | - | - | - | - | - |
| SE41m     | <i>S. epidermidis</i> | Moscow      | trachea      | N/D | N/D | N/D | N/D | N/D  | N/D | N/D | N/D | N/D | N/D | 2   |  | - | - | - | - | - |
| SE513     | <i>S. epidermidis</i> | Moscow      | fecal masses | R   | R   | R   | S   | S    | R   | N/D | N/D | S   | S   | 22  |  | - | - | - | - | - |
| SE517-1   | <i>S. epidermidis</i> | Moscow      | trachea      | R   | R   | S   | S   | R    | R   | N/D | N/D | S   | S   | 59  |  | - | - | - | - | - |
| SE528     | <i>S. epidermidis</i> | Moscow      | throat       | R   | S   | R   | S   | R    | R   | N/D | N/D | S   | S   | 2   |  | - | - | - | - | - |
| SE535 - 1 | <i>S. epidermidis</i> | Moscow      | fecal masses | R   | S   | S   | S   | R    | R   | N/D | N/D | R   | S   | 81  |  | - | - | - | - | - |
| SE545     | <i>S. epidermidis</i> | Moscow      | fecal masses | R   | S   | S   | S   | R    | R   | N/D | N/D | S   | S   | 59  |  | - | - | - | - | - |
| SE559     | <i>S. epidermidis</i> | Moscow      | fecal masses | R   | R   | S   | S   | R    | R   | N/D | N/D | R   | S   | 22  |  | + | - | + | + | - |
| SE564     | <i>S. epidermidis</i> | Moscow      | throat       | R   | S   | S   | R   | S    | R   | N/D | N/D | S   | S   | 89  |  | + | - | + | + | + |

|           |                        |                  |                  |   |     |     |     |     |     |     |     |     |     |    |  |   |   |   |   |   |
|-----------|------------------------|------------------|------------------|---|-----|-----|-----|-----|-----|-----|-----|-----|-----|----|--|---|---|---|---|---|
| SE573 - 1 | <i>S. epidermidis</i>  | Moscow           | fecal masses     | R | R   | S   | S   | R   | R   | N/D | N/D | R   | S   | 22 |  | - | - | - | - | - |
| SE573 - 2 | <i>S. epidermidis</i>  | Moscow           | fecal masses     | R | R   | S   | S   | R   | R   | N/D | N/D | R   | S   | 81 |  | - | - | - | - | - |
| SE604     | <i>S. epidermidis</i>  | Moscow           | throat           | R | R   | R   | S   | R   | R   | N/D | N/D | S   | S   | 2  |  | - | - | - | - | - |
| SE646 - 2 | <i>S. epidermidis</i>  | Moscow           | throat           | R | R   | R   | S   | R   | R   | N/D | N/D | S   | S   | 59 |  | - | - | - | - | - |
| SE705     | <i>S. epidermidis</i>  | Moscow           | trachea          | R | R   | S   | S   | R   | R   | N/D | N/D | S   | S   | 59 |  | - | - | - | - | - |
| SE864 - 2 | <i>S. epidermidis</i>  | Moscow           | fecal masses     | S | N/D | N/D | N/D | N/D | N/D | N/D | N/D | N/D | N/D | 59 |  | - | - | - | - | - |
| SH39      | <i>S. haemolyticus</i> | Moscow           | N/D              |   |     |     |     |     |     |     |     |     |     | 17 |  | - | - | - | - | - |
| SH516     | <i>S. haemolyticus</i> | Moscow           | throat           | R | S   | R   | R   | R   | R   |     |     | S   | S   | 17 |  | - | - | - | - | - |
| SH10V     | <i>S. haemolyticus</i> | Saint Petersburg | conjunctiva      | S | S   | S   |     | R   | S   | S   |     | S   |     | 19 |  | - | - | - | - | - |
| SH18mSt   | <i>S. haemolyticus</i> | Ulyanovsk        | skin and tissues | S |     | S   | S   | S   |     |     | S   | S   | S   | 12 |  | - | - | - | - | - |
| SH21mSt   | <i>S. haemolyticus</i> | Ulyanovsk        | skin and tissues | S |     | S   | S   | S   |     |     | S   | S   | S   | 12 |  | - | - | - | - | - |
| SH240UT   | <i>S. haemolyticus</i> | Tomsk            | urine            | S |     | S   |     |     | S   | S   |     |     | S   | 20 |  | - | - | - | - | - |
| SH29-2St  | <i>S. haemolyticus</i> | Ulyanovsk        | skin and tissues | R |     | S   | S   | R   |     |     | S   | R   | S   | 9  |  | - | - | - | - | - |
| SH38mSt   | <i>S. haemolyticus</i> | Ulyanovsk        | skin and tissues | R |     | S   | S   | R   |     |     | S   | R   | S   | 12 |  | - | - | - | - | - |
| SH582REV  | <i>S. haemolyticus</i> | Yekaterinburg    | blood            | R | S   | R   | S   | R   | R   | R   | S   | S   | S   | 1  |  | - | - | - | - | - |
| SH616UT   | <i>S. haemolyticus</i> | Kazan            | urine            | S |     | S   |     |     | R   | S   |     |     | S   | 21 |  | - | - | - | - | - |
| SH622UT   | <i>S. haemolyticus</i> | Kazan            | urine            | R |     | R   |     |     | R   | R   |     |     | S   | 7  |  | - | - | - | - | - |
| SH864-1   | <i>S. haemolyticus</i> | Moscow           | fecal masses     |   |     |     |     |     |     |     |     |     |     | 11 |  | - | - | - | - | - |
| SH421     | <i>S. haemolyticus</i> | Moscow           | throat           | R | S   | R   | S   | R   | R   |     |     | S   | S   | 5  |  | - | - | - | - | - |
| SH568     | <i>S. haemolyticus</i> | Moscow           | throat           | R | S   | R   | S   | R   | R   |     |     | S   | S   | 12 |  | - | - | - | - | - |

Table S2. The efficiency of plating of bacteriophages vB\_SauM-515A1 and vB\_SauP-436A1

| Strain    | Species               | EOP of vB_SauM-515A1,% | EOP of vB_SauP-436A1,% |
|-----------|-----------------------|------------------------|------------------------|
| SA0037REV | Staphylococcus aureus | 300                    | 67                     |
| SA0038REV | Staphylococcus aureus | 58                     | lysis from without     |
| SA0054V   | Staphylococcus aureus | 1000                   | 2                      |
| SA0064BAS | Staphylococcus aureus | 267                    | 400                    |
| SA0088ST  | Staphylococcus aureus | 233                    | 167                    |
| SA0088V   | Staphylococcus aureus | 183                    | 2                      |
| SA0103BAS | Staphylococcus aureus | 250                    | 133                    |
| SA0117V   | Staphylococcus aureus | lysis from without     | lysis from without     |
| SA0120V   | Staphylococcus aureus | 150                    | 14                     |
| SA0156V   | Staphylococcus aureus | 383                    | lysis from without     |
| SA0158V   | Staphylococcus aureus | 283                    | 233                    |
| SA0177REV | Staphylococcus aureus | 167                    | 117                    |
| SA0191REV | Staphylococcus aureus | lysis from without     | lysis from without     |
| SA0220V   | Staphylococcus aureus | 150                    | 200                    |
| SA0293REV | Staphylococcus aureus | 167                    | 140                    |
| SA0346ST  | Staphylococcus aureus | 150                    | 35                     |
| SA0372ST  | Staphylococcus aureus | 150                    | 230                    |
| SA0385REV | Staphylococcus aureus | 233                    | 105                    |
| SA0395ST  | Staphylococcus aureus | 183                    | 25                     |
| SA0402REV | Staphylococcus aureus | 183                    | 83                     |
| SA0413REV | Staphylococcus aureus | 283                    | 70                     |
| SA0422ST  | Staphylococcus aureus | 233                    | 100                    |
| SA436     | Staphylococcus aureus | 0                      | 100                    |
| SA0440ST  | Staphylococcus aureus | 267                    | lysis from without     |
| SA0445ST  | Staphylococcus aureus | 133                    | lysis from without     |
| SA0449REV | Staphylococcus aureus | 233                    | lysis from without     |
| SA0462ST  | Staphylococcus aureus | 233                    | lysis from without     |
| SA0565REV | Staphylococcus aureus | 333                    | 67                     |
| SA0580REV | Staphylococcus aureus | 167                    | 233                    |
| SA0592REV | Staphylococcus aureus | 250                    | lysis from without     |
| SA0595ST  | Staphylococcus aureus | 150                    | 8                      |
| SA0617REV | Staphylococcus aureus | 200                    | 367                    |
| SA0620ST  | Staphylococcus aureus | 283                    | lysis from without     |
| SA0621REV | Staphylococcus aureus | 300                    | lysis from without     |
| SA0702REV | Staphylococcus aureus | 233                    | 167                    |
| SA0733ST  | Staphylococcus aureus | 100                    | 167                    |
| SA0736ST  | Staphylococcus aureus | 150                    | 57                     |
| SA0737ST  | Staphylococcus aureus | 83                     | 1                      |
| SA0756ST  | Staphylococcus aureus | 117                    | 67                     |
| SA0837ST  | Staphylococcus aureus | 200                    | lysis from without     |
| SA2014REV | Staphylococcus aureus | 200                    | lysis from without     |
| SA2142REV | Staphylococcus aureus | 100                    | 100                    |



|           |                       |                    |                    |
|-----------|-----------------------|--------------------|--------------------|
| SA2242REV | Staphylococcus aureus | 300                | 250                |
| SA2260REV | Staphylococcus aureus | 350                | 50                 |
| SA2263REV | Staphylococcus aureus | lysis from without | lysis from without |
| SA2281REV | Staphylococcus aureus | 400                | 10                 |
| SA2341REV | Staphylococcus aureus | 100                | 433                |
| SA2377REV | Staphylococcus aureus | 250                | 167                |
| SA2429REV | Staphylococcus aureus | 50                 | 300                |
| SA0515    | Staphylococcus aureus | 100                | 0                  |

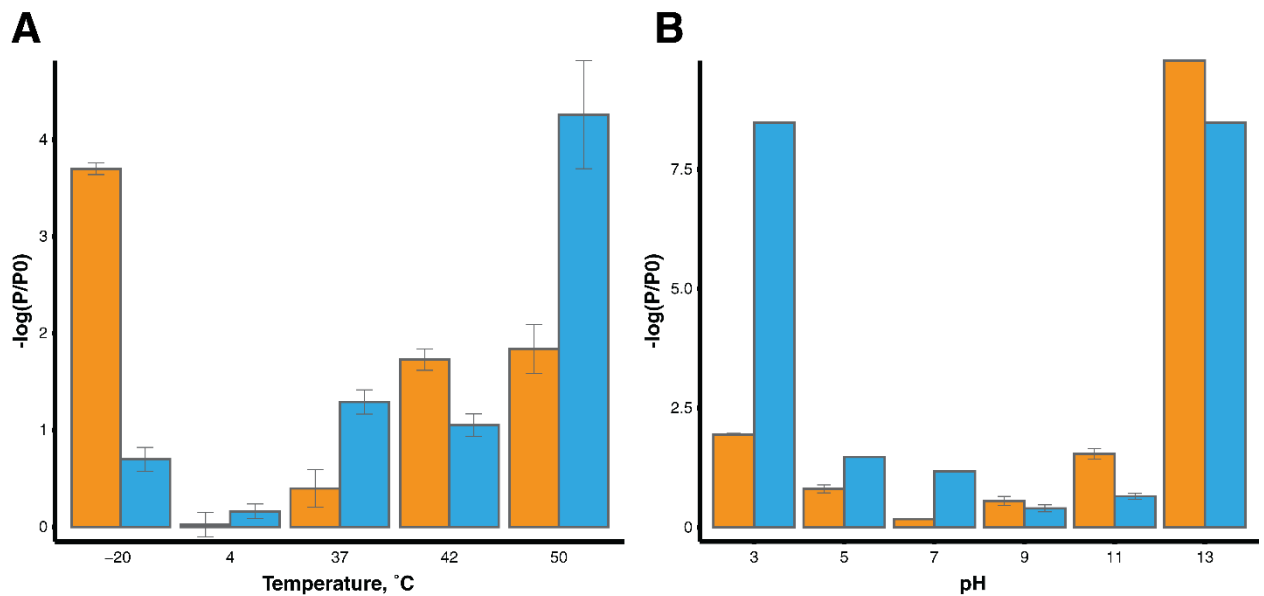

**Figure S1.** Stability of the vB\_SauM-515A1 (orange bars), and vB\_SauP-436A1 (blue bars) phages under different temperatures and pH conditions. A: Effect of temperature towards the infection ability of vB\_SauM-515A1, and vB\_SauP-436A1. A comparison of the titers of bacteriophages at various temperatures was carried out with the titer of the corresponding bacteriophage at 4° C. B: Influence of pH towards the infection ability of vB\_SauM-515A1, and vB\_SauP-436A1. Phage suspensions were incubated for 24 h at the different pH values and compared with control (pH=8).
